# Supplementary material for: Temporal Variation in Community Composition of Root Associated Endophytic Fungi and Carbon and Nitrogen Stable Isotope Abundance in Two Bletilla Species (Orchidaceae)
Source: PubMed Central journal article supplement (PMC7824424; doi:10.3390/plants10010018), 2020-12-24
Supplement: plants-10-00018-s001.pdf [file plants-10-00018-s001.pdf]

A Dormancy & Emergence & Florescence & Fruiting & Relaxation on genus level

BS

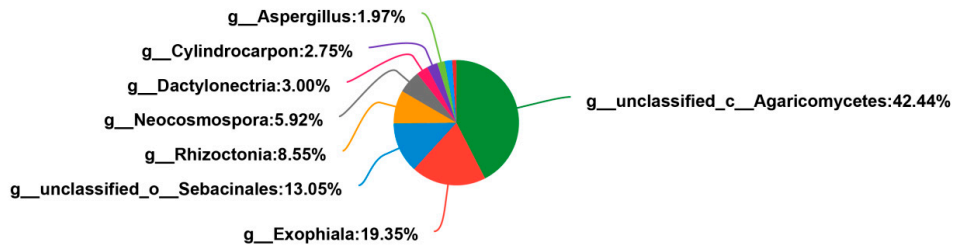

B Dormancy & Emergence & Florescence & Fruiting & Relaxation on genus level

BO

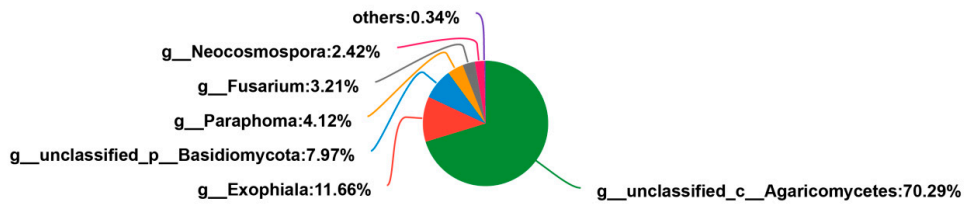

Figure S1. Microbial community pieplots of fungi species shared among all five phenological stages in association with *Bletilla striata* (A) and *B. ochracea* (B) on genus level.

Table S1. Temporal variation in mycorrhizal diversity associated with *Bletilla striata* and *B. ochracea*.

|                    | Growth stage | Sobs index | Shannon index | Simpson's index | Coverage (%) |
|--------------------|--------------|------------|---------------|-----------------|--------------|
| <i>B. striata</i>  | Florescence  | 86 ± 17a   | 2.55 ± 0.33a  | 0.17 ± 0.05a    | 99.95a       |
|                    | Fruiting     | 43 ± 10b   | 1.46 ± 0.33b  | 0.42 ± 0.14a    | 99.98a       |
|                    | Dormancy     | 44 ± 3b    | 1.23 ± 0.42b  | 0.56 ± 0.16a    | 99.96a       |
|                    | Emergence    | 55 ± 9ab   | 2.24 ± 0.13ab | 0.2 ± 0.04a     | 99.97a       |
|                    | Relaxation   | 31 ± 7b    | 1.58 ± 0.32ab | 0.4 ± 0.14a     | 99.95a       |
| <i>B. ochracea</i> | Florescence  | 66 ± 4ab   | 1.7 ± 0.19abc | 0.34 ± 0.04ab   | 99.96a       |
|                    | Fruiting     | 31 ± 8c    | 1.34 ± 0.13bc | 0.4 ± 0.05ab    | 99.98a       |
|                    | Dormancy     | 47 ± 6bc   | 1.23 ± 0.34c  | 0.5 ± 0.17a     | 99.96a       |
|                    | Emergence    | 75 ± 4a    | 2.03 ± 0.15ab | 0.27 ± 0.06ab   | 99.96a       |
|                    | Relaxation   | 61 ± 8ab   | 2.34 ± 0.22a  | 0.19 ± 0.04c    | 99.97a       |

Values of each index across growth stages followed by different lowercase letters are significantly different ( $p < 0.05$ ).

Table S2. Soil nutrients and pH for *Bletilla striata* and *B. ochracea* sites (mean ± SE values).

|                    | TC (%)       | TN (g/kg)   | TP (g/kg)   | pH   |
|--------------------|--------------|-------------|-------------|------|
| <i>B. striata</i>  | 9.97 ± 1.41  | 4.25 ± 0.58 | 1.14 ± 0.11 | 7.37 |
| <i>B. ochracea</i> | 10.86 ± 1.06 | 4.15 ± 0.36 | 1 ± 0.06    | 7.25 |

TC, total carbon; TN, total nitrogen; TP, total phosphorus
